# Supplementary material for: FCGR2A, FCGR3A polymorphisms and therapeutic efficacy of anti-EGFR monoclonal antibody in metastatic colorectal cancer
Source: PubMed Central journal article supplement (PMC4695045; doi:10.18632/oncotarget.4872), 2015-08-19
Supplement: oncotarget-06-28071-s001.pdf [file oncotarget-06-28071-s001.pdf]

## SUPPLEMENTARY TABLE

Supplementary Table S1: The baseline characteristics of the study included in the meta-analysis

| Author       | Country              | Race             | Design        | Patient                                  | KRAS status   | Antibody               | Locus          | Detection          | Criteria    | Clinical outcome               |
|--------------|----------------------|------------------|---------------|------------------------------------------|---------------|------------------------|----------------|--------------------|-------------|--------------------------------|
| Zhang 2007   | USA                  | Caucasian        | Prospective   | 39 chemorefractory mCRC cases            | Wild/ mutated | Cetuximab              | H131R/ V158F   | AS-PCR             | RECIST 1.0  | CR, PR, SD, PD, PFS, OS        |
| Bibeau 2009  | France               | Caucasian        | Retrospective | 69 chemorefractory mCRC cases            | Wild/ mutated | Cetuximab              | H131R/ V158F   | Sequencing, AS-PCR | RECIST 1.0  | CR, PR, SD, PD, PFS            |
| Paez 2010    | Spain                | Caucasian        | Retrospective | 104 chemorefractory mCRC cases           | Wild/ mutated | Cetuximab, panitumumab | H131R/ V158F   | TaqMan             | RECIST 1.0  | CR, PR, PD, SD, PFS            |
| Zhang 2010   | USA                  | Caucasian        | Retrospective | 83 chemorefractory mCRC cases            | Wild/ mutated | Cetuximab,             | H131R, / V158F | PCR-RFLP           | not concern | Response, no-response, PFS, OS |
| Pander 2010  | Holland              | Caucasian        | Prospective   | 246 chemorefractory mCRC cases           | Wild          | Cetuximab              | H131R/ V158F   | TaqMan, sequencing | RECIST 1.0  | PFS                            |
| Dahan 2011   | France               | Caucasian        | Retrospective | 58 chemorefractory mCRC cases            | Wild          | Cetuximab              | H131R/ V158F   | PCR-RFLP           | RECIST 1.1  | CR, PR, PD, SD, PFS, OS        |
| Etienne 2011 | France               | Caucasian        | Prospective   | 52 chemorefractory mCRC cases            | Wild/ mutated | Cetuximab              | H131R/ V158F   | PCR-RFLP           | RECIST 1.1  | CR, PR, PD, SD, PFS, OS        |
| Calemma 2012 | Italy                | Caucasian        | Retrospective | 74 chemorefractory mCRC cases            | Wild          | Cetuximab, panitumumab | H131R/ V158F   | Sequencing         | RECIST 1.0  | CR, PR, PD, SD, PFS            |
| Park 2012    | Korea                | Asian            | Retrospective | 107 chemorefractory mCRC cases           | Wild/ mutated | Cetuximab              | H131R/ V158F   | TaqMan             | RECIST 1.1  | Response, no-response, PFS, OS |
| Saito 2013   | Japan                | Asian            | Retrospective | 32 chemorefractory recurrent mCRC cases. | Wild          | Cetuximab, panitumumab | H131R/ V158F   | TaqMan             | RECIST 1.1  | CR, PR, PD, SD, PFS, OS        |
| Geva 2014    | European, Japan, USA | Asian, Caucasian | Retrospective | 1123 chemorefractory mCRC cases          | Wild/ mutated | Cetuximab              | H131R/ V158F   | Taqman             | RECIST 1.0  | CR, PR, PD, SD, PFS, OS        |
| Inoue 2014   | Japan                | Asian            | Prospective   | 57 chemorefractory mCRC cases            | Wild          | Cetuximab              | H131R/ V158F   | Sequencing         | RECIST 1.0  | CR, PR, PD, SD, PFS, OS        |
| Kjersem 2014 | Norway               | Caucasian        | Prospective   | 571 chemorefractory mCRC cases           | Wild/ mutated | Cetuximab              | H131R/ V158F   | Taqman             | RECIST 1.0  | Response, no-response, PFS, OS |
| Negri 2014   | Italy                | Caucasian        | Retrospective | 86 chemorefractory mCRC cases            | Wild/ mutated | Cetuximab              | H131R/ V158F   | Sequencing         | RECIST 1.1  | CR, PR, PD, SD, TTP, OS        |
| Ying 2015    | China                | Asian            | Retrospective | 82 chemorefractory mCRC cases            | Wild          | Cetuximab              | H131R/ V158F   | Taqman             | RECIST 1.1  | CR, PR, PD, SD, PFS, OS        |

**Abbreviation:** mCRC: metastatic colorectal cancer; AS-PCR: allele specific-polymerase chain reaction; PCR-RFLP: polymerase chain reaction-restrained fragment length polymorphism; RECIST: response evaluation criteria in solid tumors; CR: complete response; PR: partial response; PD: progressive disease; SD: stable disease; TTP: time to progression; PFS: progression-free survival; OS: overall survival.
